# Supplementary material
Source: PubMed Central journal article supplement (PMC8554385)
Supplement: mmc1.pdf [file mmc1.pdf]

# THE LANCET

## Infectious Diseases

### Supplementary appendix

This appendix formed part of the original submission and has been peer reviewed. We post it as supplied by the authors.

Supplement to: Patone M, ThomasK, Hatch R, et al. Mortality and critical care unit admission associated with the SARS-CoV-2 lineage B.1.1.7 in England: an observational cohort study. *Lancet Infect Dis* 2021; published online June 22. [https://doi.org/10.1016/S1473-3099\(21\)00318-2](https://doi.org/10.1016/S1473-3099(21)00318-2).

Page content (appendix)

Page 2: (Top-left) Weekly positive tests by variant from 1st November to 26th January 2021, (top-right) weekly deaths by variant from 1st November to 23rd February 2021, (bottom-left) weekly critical care admissions per variant from 1st November to 7th February 2021, (bottom-right) weekly deaths at the end of critical care by variant from 1st November 2020 to 7th February 2021. SGTF status was used as a proxy for VOC B.1.1.7.

Page 3: Demographics characteristics of primary care patients tested positive in hospital and community settings between 1st November 2020 and 26th January 2021 and of those with SGTF status known or not.

Page 5: Value of p-value for testing the interaction between sex, age and ethnicity with the SGTF status in each model.

Page 7: Critical care outcomes observed in the critical care cohort, by variant.

Page 8: Demographic, medical characteristics and indicators of acute severity observed for patients in the critical care cohort who have completed their critical care outcome (discharged alive or dead).

Page 10: Demographic, medical characteristics and indicators of acute severity observed in patients of the critical care-cohort after matching.

Page 12: Demographics characteristics of primary care patients tested positive in hospital and community settings between 1st November 2020 and 26th January 2021 by months.

Page 15: Counts of deaths by region compared with the ones observed in the primary care cohort. The counts of deaths in England were taken from <https://coronavirus.data.gov.uk/details/deaths>. All regions were covered in the primary care cohort for both the SGTF and non-SGTF

**Appendix part 1: (Top-left) Weekly positive tests by variant from 1<sup>st</sup> November to 26<sup>th</sup> January 2021, (top-right) weekly deaths by variant from 1<sup>st</sup> November to 23<sup>rd</sup> February 2021, (bottom-left) weekly critical care admissions per variant from 1<sup>st</sup> November to 7<sup>th</sup> February 2021, (bottom-right) weekly deaths at the end of critical care by variant from 1<sup>st</sup> November 2020 to 7<sup>th</sup> February 2021. SGTF status was used as a proxy for VOC B.1.1.7.**

## Weekly COVID-19 outcomes by variants

Weekly positive tests

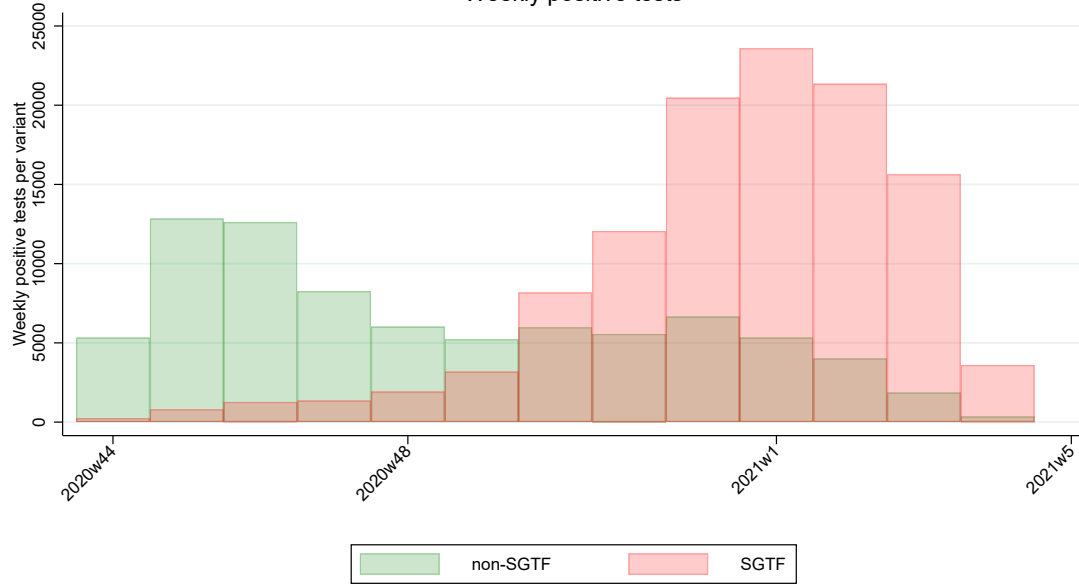

Data sources: QReserach, ICNARC COVID-19 study and PHE.  
Time period: 1st November - 26th January 2021. Unadjusted, complete case analysis.  
\*S-gene molecular diagnostic assay failure (SGTF) is used as a proxy for VOC B.1.1.7.

Weekly deaths

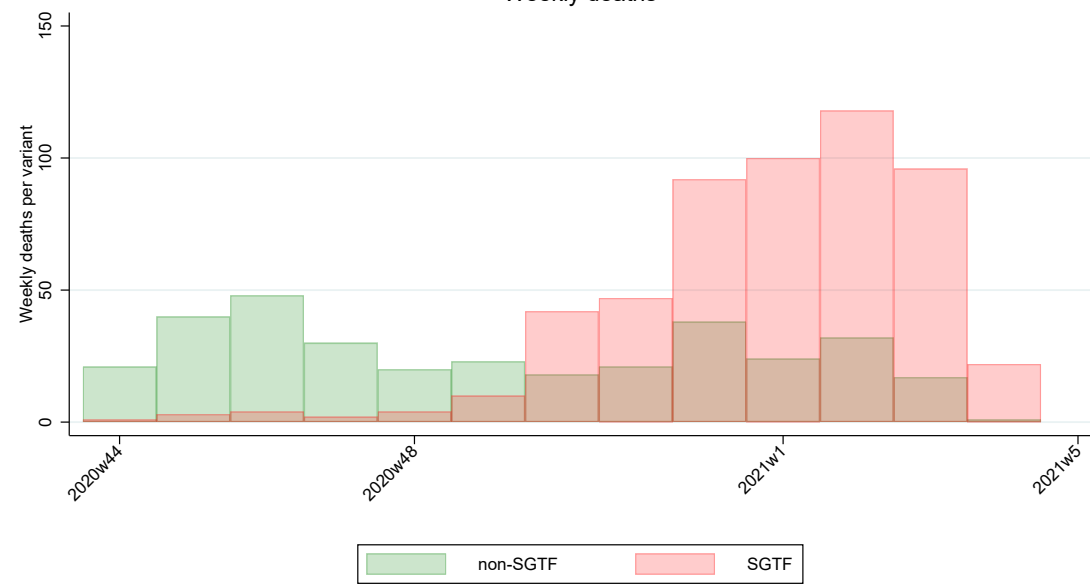

Data sources: QReserach, ICNARC COVID-19 study and PHE.  
Time period: 1st November - 23rd February 2021. Unadjusted, complete case analysis.  
\*S-gene molecular diagnostic assay failure (SGTF) is used as a proxy for VOC B.1.1.7.

Weekly CCU admission

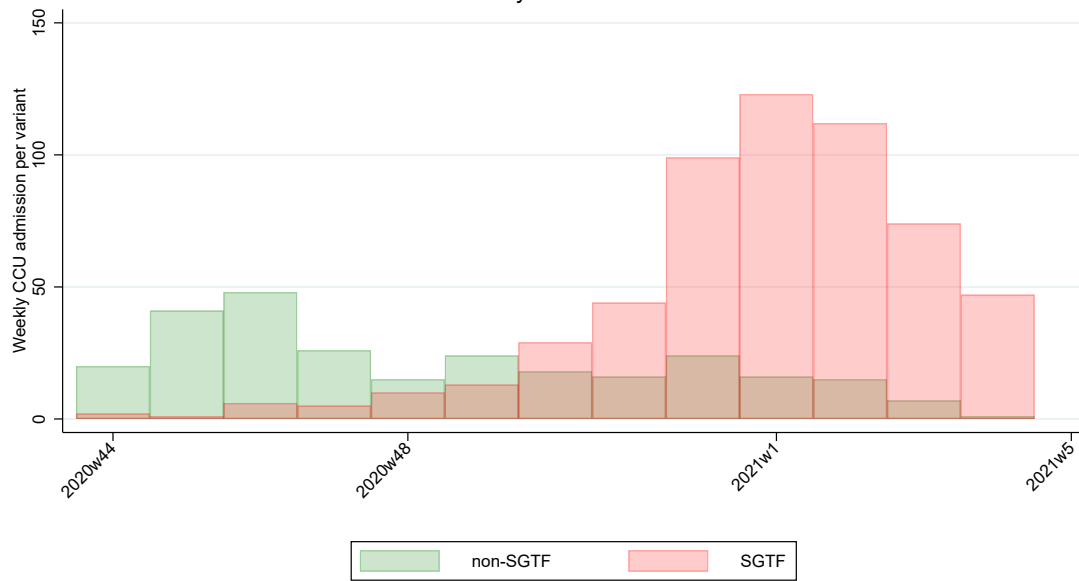

Data sources: QReserach  
Time period: 1st November - 7th February 2021. Unadjusted, complete case analysis.  
\*S-gene molecular diagnostic assay failure (SGTF) is used as a proxy for VOC B.1.1.7.

Weekly CCU deaths

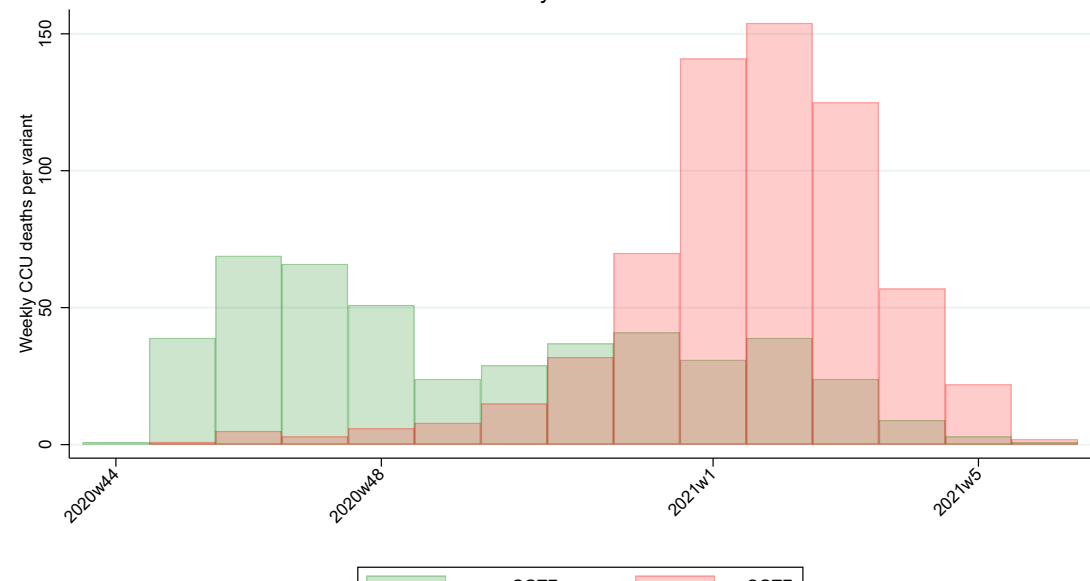

Data source: Case Mix Program & PHE. From 1st November 2020 until 7th February 2021

**Appendix, part 2: Demographics characteristics of primary care patients tested positive in hospital and community settings between 1<sup>st</sup> November 2020 and 26<sup>th</sup> January 2021 and of those with SGTF status known or not.**

|                                 | <b>Hospital settings</b> | <b>Community settings</b> | <b>SGTF status unknown (community test only)</b> | <b>SGTF status known (community test only)</b> |
|---------------------------------|--------------------------|---------------------------|--------------------------------------------------|------------------------------------------------|
|                                 | <i>Cols% (counts)</i>    | <i>Cols% (counts)</i>     | <i>Cols% (counts)</i>                            | <i>Cols% (counts)</i>                          |
| <b>Total number of patients</b> | 48039                    | 381887                    | 183467                                           | 198420                                         |
| <b>Mean age (SD)</b>            | 56.7 (23.5)              | 38.3 (18.8)               | 39.1 (19.8)                                      | 37.7 (17.8)                                    |
| <b>Deaths</b>                   | 15.8 (7606)              | 0.9 (3493)                | 1.4 (2594)                                       | 0.5 (899)                                      |
| <b>CCU admitted</b>             | 3.4 (1629)               | 0.3 (1248)                | 0.3 (536)                                        | 0.4 (836)                                      |
| <b>SGTF</b>                     | 0                        | 30.9 (117926)             |                                                  |                                                |
| <b>Sex</b>                      |                          |                           |                                                  |                                                |
| Female                          | 55.0 (26408)             | 54.3 (207295)             | 55.9 (102640)                                    | 52.7 (104655)                                  |
| Male                            | 45.0 (21631)             | 45.7 (174592)             | 44.1 (80827)                                     | 47.3 (93765)                                   |
| <b>Age groups</b>               |                          |                           |                                                  |                                                |
| 18-29                           | 15.6 (7499)              | 35.6 (135991)             | 35.4 (64869)                                     | 35.8 (71122)                                   |
| 30-39                           | 12.3 (5899)              | 19.5 (74447)              | 19.1 (35023)                                     | 19.9 (39424)                                   |
| 40-49                           | 11.9 (5725)              | 16.6 (63563)              | 16.2 (29686)                                     | 17.1 (33877)                                   |
| 50-59                           | 13.4 (6420)              | 15.1 (57743)              | 14.6 (26797)                                     | 15.6 (30946)                                   |
| 60-69                           | 11.0 (5301)              | 7.5 (28539)               | 7.4 (13559)                                      | 7.5 (14980)                                    |
| 70-79                           | 13.2 (6325)              | 3.0 (11627)               | 3.3 (6123)                                       | 2.8 (5504)                                     |
| 80-99                           | 22.6 (10870)             | 2.6 (9977)                | 4.0 (7410)                                       | 1.3 (2567)                                     |
| <b>Ethnicity</b>                |                          |                           |                                                  |                                                |
| White                           | 61.8 (29685)             | 58.7 (224187)             | 57.9 (106264)                                    | 59.4 (117923)                                  |
| Indian                          | 3.3 (1596)               | 3.9 (14829)               | 3.8 (6883)                                       | 4.0 (7946)                                     |
| Pakistani                       | 2.5 (1189)               | 3.6 (13700)               | 2.9 (5332)                                       | 4.2 (8368)                                     |
| Bangladeshi                     | 2.0 (965)                | 3.4 (13077)               | 4.1 (7520)                                       | 2.8 (5557)                                     |
| Other Asian                     | 2.5 (1204)               | 2.4 (9135)                | 2.5 (4651)                                       | 2.3 (4484)                                     |
| Caribbean                       | 2.1 (1017)               | 1.2 (4451)                | 1.5 (2712)                                       | 0.9 (1739)                                     |
| Black African                   | 3.5 (1698)               | 2.5 (9692)                | 3.0 (5594)                                       | 2.1 (4098)                                     |
| Chinese                         | 0.3 (146)                | 0.3 (1215)                | 0.4 (683)                                        | 0.3 (532)                                      |
| Other ethnic group              | 4.4 (2120)               | 4.5 (17224)               | 5.1 (9415)                                       | 3.9 (7809)                                     |
| Not recorded                    | 17.5 (8419)              | 19.5 (74377)              | 18.8 (34413)                                     | 20.1 (39964)                                   |
| <b>House size</b>               |                          |                           |                                                  |                                                |
| 1 person                        | 39.9 (19185)             | 26.3 (100579)             | 26.5 (48567)                                     | 26.2 (52012)                                   |
| 2 people                        | 23.7 (11407)             | 19.9 (75912)              | 19.6 (35936)                                     | 20.1 (39976)                                   |
| 3-5 people                      | 28.8 (13848)             | 45.2 (172476)             | 44.2 (81098)                                     | 46.1 (91378)                                   |
| 6-10 people or more             | 7.5 (3599)               | 8.6 (32920)               | 9.7 (17866)                                      | 7.6 (15054)                                    |
| <b>Period of positive test</b>  |                          |                           |                                                  |                                                |
| 1 Nov to 14 Nov                 | 24.6 (11822)             | 22.0 (84091)              | 24.3 (44533)                                     | 19.6 (39558)                                   |
| 15 Nov to 28 Nov                | 11.0 (5303)              | 11.1 (42337)              | 7.8 (14393)                                      | 14.1 (27944)                                   |
| 29 Nov to 12 Dec                | 9.7 (4675)               | 8.1 (30853)               | 6.2 (11465)                                      | 9.8 (19388)                                    |
| 13 Dec to 26 Dec                | 10.2 (4920)              | 8.0 (30438)               | 6.4 (11744)                                      | 9.4 (18694)                                    |
| 27 Dec to 10 Jan                | 18.0 (8639)              | 17.3 (65985)              | 17.1 (31438)                                     | 17.4 (34547)                                   |
| 11 Jan to 26 Jan                | 26.4 (12680)             | 33.6 (128183)             | 38.1 (69894)                                     | 29.4 (58289)                                   |
| <b>House type</b>               |                          |                           |                                                  |                                                |
| Neither                         | 96.3 (46242)             | 98.8 (377466)             | 97.9 (179698)                                    | 99.7 (197768)                                  |
| Carehome                        | 3.4 (1643)               | 1.1 (4062)                | 1.9 (3565)                                       | 0.3 (497)                                      |
| Homeless                        | 0.3 (154)                | 0.1 (359)                 | 0.1 (204)                                        | 0.1 (155)                                      |
| <b>BMI</b>                      |                          |                           |                                                  |                                                |
| <25                             | 59.9 (28768)             | 55.4 (211753)             | 56.2 (103178)                                    | 54.7 (108575)                                  |
| 25-30                           | 15.9 (7621)              | 12.6 (48021)              | 12.4 (22661)                                     | 12.8 (25360)                                   |
| 30-40                           | 7.3 (3518)               | 5.2 (19709)               | 5.0 (9174)                                       | 5.3 (10535)                                    |
| >= 40                           | 4.0 (1941)               | 2.8 (10586)               | 2.7 (4895)                                       | 2.9 (5691)                                     |
| Not recorded                    | 12.9 (6191)              | 24.0 (91818)              | 23.7 (43559)                                     | 24.3 (48259)                                   |

|                             |              |               |               |               |
|-----------------------------|--------------|---------------|---------------|---------------|
| <b>Smoking status</b>       |              |               |               |               |
| Non smoker                  | 56.7 (27255) | 55.9 (213519) | 55.5 (101890) | 56.3 (111629) |
| Ex smoker                   | 26.2 (12593) | 17.4 (66378)  | 17.2 (31474)  | 17.6 (34904)  |
| Light smoker                | 8.7 (4167)   | 9.5 (36284)   | 10.1 (18553)  | 8.9 (17731)   |
| Moderate smoker             | 1.8 (846)    | 1.7 (6630)    | 1.8 (3358)    | 1.6 (3272)    |
| Heavy smoker                | 1.0 (475)    | 0.6 (2316)    | 0.6 (1185)    | 0.6 (1131)    |
| Not recorded                | 5.6 (2703)   | 14.9 (56760)  | 14.7 (27007)  | 15.0 (29753)  |
| <b>Geographical region</b>  |              |               |               |               |
| East Midlands               | 1.5 (741)    | 1.8 (6847)    | 2.2 (4013)    | 1.4 (2834)    |
| East of England             | 3.8 (1827)   | 3.4 (13163)   | 4.3 (7823)    | 2.7 (5340)    |
| London                      | 28.0 (13441) | 33.1 (126460) | 41.3 (75816)  | 25.5 (50644)  |
| North East                  | 2.5 (1222)   | 1.9 (7435)    | 0.6 (1175)    | 3.2 (6260)    |
| North West                  | 18.4 (8853)  | 16.2 (61757)  | 6.8 (12533)   | 24.8 (49224)  |
| South Central               | 11.3 (5433)  | 10.9 (41494)  | 10.7 (19667)  | 11.0 (21827)  |
| South East                  | 12.3 (5932)  | 13.4 (51299)  | 16.2 (29745)  | 10.9 (21554)  |
| South West                  | 8.4 (4015)   | 6.5 (24910)   | 9.3 (17051)   | 4.0 (7859)    |
| West Midlands               | 10.9 (5248)  | 10.3 (39273)  | 7.0 (12898)   | 13.3 (26375)  |
| Yorkshire & Humber          | 2.8 (1327)   | 2.4 (9249)    | 1.5 (2746)    | 3.3 (6503)    |
| <b>Deprivation quintile</b> |              |               |               |               |
| 1 (least deprived)          | 18.8 (9042)  | 18.7 (71332)  | 16.9 (31076)  | 20.3 (40256)  |
| 2                           | 20.0 (9628)  | 20.9 (79745)  | 20.1 (36926)  | 21.6 (42819)  |
| 3                           | 21.4 (10258) | 21.0 (80043)  | 20.5 (37588)  | 21.4 (42455)  |
| 4                           | 20.7 (9936)  | 20.1 (76918)  | 20.4 (37343)  | 19.9 (39575)  |
| 5 (most deprived)           | 18.6 (8921)  | 18.7 (71386)  | 21.5 (39443)  | 16.1 (31943)  |
| Not recorded                | 0.5 (254)    | 0.6 (2463)    | 0.6 (1091)    | 0.7 (1372)    |
| <b>Comorbidities</b>        |              |               |               |               |
| Asthma                      | 15.2 (7304)  | 14.5 (55557)  | 14.0 (25765)  | 15.0 (29792)  |
| COPD                        | 7.0 (3340)   | 1.1 (4032)    | 1.2 (2159)    | 0.9 (1873)    |
| Diabetes type 1             | 0.9 (423)    | 0.5 (2086)    | 0.6 (1028)    | 0.5 (1058)    |
| Diabetes type 2             | 17.2 (8246)  | 5.0 (19272)   | 5.4 (9983)    | 4.7 (9289)    |
| Hypertension                | 33.6 (16141) | 10.7 (41046)  | 11.7 (21410)  | 9.9 (19636)   |
| Parkinson                   | 1.2 (568)    | 0.2 (612)     | 0.3 (466)     | 0.1 (146)     |
| Epilepsy                    | 2.3 (1105)   | 1.2 (4638)    | 1.4 (2488)    | 1.1 (2150)    |
| Cerebral palsy              | 0.2 (109)    | 0.1 (437)     | 0.1 (257)     | 0.1 (180)     |
| MND                         | 0.0 (17)     | 0.0 (17)      | 0.0 (9)       | 0.0 (8)       |
| Huntington                  | 0.0 (10)     | 0.0 (40)      | 0.0 (34)      | 0.0 (6)       |
| Multiple sclerosis          | 0.4 (178)    | 0.1 (570)     | 0.2 (303)     | 0.1 (267)     |
| Myasthenia                  | 0.1 (41)     | 0.0 (95)      | 0.0 (47)      | 0.0 (48)      |
| Downs syndrome              | 0.1 (69)     | 0.1 (229)     | 0.1 (148)     | 0.0 (81)      |
| Learning disabilities       | 3.5 (1676)   | 1.8 (6969)    | 2.1 (3828)    | 1.6 (3141)    |

**Appendix, part 3: Value of p-value for testing the interaction between sex, age and ethnicity with the SGTF status in each model.**

|                                                            | <b>HR (95% CI)</b>       |
|------------------------------------------------------------|--------------------------|
| <b>28-days mortality (primary care cohort)</b>             |                          |
| <i>Age group &amp; SGTF (Wald test, p-value = 0.30)</i>    |                          |
| < 50 (baseline)                                            | -                        |
| >= 50 & < 60                                               | 0.39 (0.13, 1.12)        |
| >= 60 & < 70                                               | 0.48 (0.18, 1.33)        |
| >= 70 & < 80                                               | 0.45 (0.17, 1.18)        |
| >= 80                                                      | 0.37 (0.14, 0.98)        |
| <i>Sex &amp; SGTF (Wald test, p-value = 0.35)</i>          |                          |
| Female (baseline)                                          | -                        |
| Male                                                       | 0.86 (0.62, 1.19)        |
| <i>Ethnic group &amp; SGTF (Wald test, p-value = 0.75)</i> |                          |
| White (baseline)                                           | -                        |
| Indian                                                     | 1.06 (0.51, 2.19)        |
| Pakistani                                                  | 0.83 (0.42, 1.63)        |
| Bangladeshi                                                | 1.57 (0.44, 5.61)        |
| Chinese                                                    | 0.41 (0.04, 4.22)        |
| Other Asian                                                | 1.61 (0.34, 7.55)        |
| Black African and Caribbean                                | 1.20 (0.40, 3.61)        |
| Others                                                     | 2.27 (0.79, 6.50)        |
| <b>CCU admission (primary care cohort)</b>                 |                          |
| <i>Age group &amp; SGTF (Wald test, p-value = 0.23)</i>    |                          |
| < 18 (baseline)                                            | -                        |
| >= 18 & < 30                                               | <b>0.96 (0.37, 1.29)</b> |
| >= 30 & < 40                                               | <b>1.30 (0.71, 2.37)</b> |
| >= 40 & < 50                                               | <b>1.30 (0.44, 3.85)</b> |
| >= 50 & < 60                                               | <b>1.14 (0.36, 3.49)</b> |
| >= 60 & < 70                                               | <b>0.51 (0.13, 2.03)</b> |
| >= 70 & < 80                                               | <b>1.78 (0.51, 6.28)</b> |
| >= 80                                                      | <b>2.09 (0.79, 5.52)</b> |
| <i>Sex &amp; SGTF (Wald test, p-value = 0.95)</i>          |                          |
| Female (baseline)                                          | -                        |
| Male                                                       | <b>0.99 (0.71, 1.39)</b> |
| <i>Ethnic group &amp; SGTF (Wald test, p-value = 0.49)</i> |                          |
| White (baseline)                                           | -                        |
| Indian                                                     | <b>0.69 (0.37, 1.29)</b> |
| Pakistani                                                  | 1.30 (0.71, 2.37)        |
| Bangladeshi                                                | 1.29 (0.43, 3.84)        |
| Other Asian and Chinese                                    | 1.14 (0.37, 3.48)        |
| Caribbean                                                  | 0.51 (0.13, 2.03)        |
| Black African                                              | 1.78 (0.51, 6.28)        |
| Others                                                     | 2.09 (0.79, 5.52)        |
| <b>28-days mortality (critical care cohort)</b>            |                          |
| <i>Age group &amp; SGTF (Wald test, p-value = 0.53)</i>    |                          |
| < 35 (baseline)                                            | -                        |
| >= 34 & < 45                                               | 3.17 (0.89, 11.36)       |
| >= 45 & < 65                                               | 1.23 (0.60, 2.53)        |
| >= 65 & < 75                                               | 2.03 (0.98, 4.20)        |
| >= 75 & < 85                                               | 4.25 (2.03, 8.93)        |
| >= 85                                                      | 8.87 (2.99, 26.32)       |

*Sex & SGTF (Wald test, p-value = 0.95)*

|                   |                   |
|-------------------|-------------------|
| Female (baseline) | -                 |
| Male              | 1.03 (0.83, 1.28) |

*Ethnic group & SGTF (Wald test, p-value = 0.95)*

|                         |                   |
|-------------------------|-------------------|
| White (baseline)        | -                 |
| Indian                  | 0.96 (0.54, 1.70) |
| Pakistani               | 0.69 (0.42, 1.09) |
| Bangladeshi             | 0.72 (0.29, 1.78) |
| Other Asian and Chinese | 1.27 (0.69, 2.34) |
| Caribbean               | 0.37 (0.11, 1.15) |
| Black African           | 0.56 (0.21, 1.51) |
| Others                  | 0.76 (0.39, 1.47) |

---

**Appendix, part 4: Critical care outcomes observed in the critical care cohort, by variant.**

|                                                 | <b>Non-SGTF</b><br><i>Cols% (counts)</i> | <b>SGTF</b><br><i>Cols% (counts)</i> | <b>Full Cohort</b><br><i>Cols% (counts)</i> |
|-------------------------------------------------|------------------------------------------|--------------------------------------|---------------------------------------------|
| <b>Outcome at end of critical care</b>          |                                          |                                      |                                             |
| Discharged                                      | 64.3 (936)                               | 64.2 (1189)                          | 64.3 (2125)                                 |
| Died                                            | 35.7 (519)                               | 35.8 (662)                           | 35.7 (1181)                                 |
| <b>Duration of critical care.</b>               |                                          |                                      |                                             |
| <b>Days, median (IQR)</b>                       |                                          |                                      |                                             |
| Discharged patients                             | 6 (4 - 10)                               | 5 (3 - 9)                            | 6 (3 - 9)                                   |
| Deaths                                          | 13 (7 - 19)                              | 11 (6 - 16)                          | 11 (6 - 17)                                 |
| <b>Organ support*</b>                           |                                          |                                      |                                             |
| No respiratory support                          | 2.5 (36)                                 | 3.2 (59)                             | 2.9 (95)                                    |
| Advanced respiratory support                    | 47.6 (692)                               | 47.2 (873)                           | 47.3 (1565)                                 |
| Basic respiratory support                       | 86.1 (1253)                              | 82.0 (1518)                          | 83.8 (2771)                                 |
| No cardiovascular support                       | 5.7 (83)                                 | 6.8 (126)                            | 6.3 (209)                                   |
| Advanced cardiovascular support                 | 19.5 (284)                               | 19.2 (355)                           | 19.3 (639)                                  |
| Basic cardiovascular support                    | 93.0 (1353)                              | 91.3 (1690)                          | 92.0 (3043)                                 |
| Renal support                                   | 13.6 (198)                               | 12.0 (223)                           | 12.7 (421)                                  |
| Liver support                                   | 2.2 (32)                                 | 4.2 (78)                             | 3.3 (110)                                   |
| Neurological support                            | 7.0 (102)                                | 7.3 (135)                            | 7.2 (237)                                   |
| <b>Duration of organ support*</b>               |                                          |                                      |                                             |
| <b>Days, median (IQR)</b>                       |                                          |                                      |                                             |
| Advanced respiratory support                    | 11 (6 - 19)                              | 9 (5 - 15)                           | 10 (6 - 16)                                 |
| Total (advanced + basic) respiratory support    | 8 (4 - 15)                               | 7 (4 - 13)                           | 8 (4 - 14)                                  |
| Advanced cardiovascular support                 | 2 (1 - 5)                                | 2 (1 - 4)                            | 2 (1 - 5)                                   |
| Total (advanced + basic) cardiovascular support | 8 (5 - 15)                               | 7 (4 - 13)                           | 8 (4 - 14)                                  |
| Renal support                                   | 5.5 (3 - 10)                             | 4.5 (2 - 9)                          | 5 (2 - 9)                                   |

\* Among patients who have been discharged or died.



**Appendix, part 5: Demographic, medical characteristics and indicators of acute severity observed for patients in the critical care cohort who have completed their critical care outcome (discharged alive or dead).**

|                                                           | <b>Non-SGTF</b><br><i>Cols% (counts)</i> | <b>SGTF</b><br><i>Cols% (counts)</i> | <b>Full Cohort</b><br><i>Cols% (counts)</i> |
|-----------------------------------------------------------|------------------------------------------|--------------------------------------|---------------------------------------------|
| <b>Total number of patients</b>                           | 1455                                     | 1851                                 | 3306                                        |
| <b>Mean age (SD)</b>                                      | 59.2 (12.8)                              | 57.7 (12.7)                          | 58.4 (12.7)                                 |
| <b>Sex</b>                                                |                                          |                                      |                                             |
| Female                                                    | 32.6 (475)                               | 33.4 (619)                           | 33.1 (1094)                                 |
| Male                                                      | 67.4 (980)                               | 66.6 (1232)                          | 66.9 (2212)                                 |
| <b>Ethnicity</b>                                          |                                          |                                      |                                             |
| White                                                     | 72.8 (1059)                              | 68.2 (1262)                          | 70.2 (2321)                                 |
| Indian                                                    | 4.0 (58)                                 | 3.8 (71)                             | 3.9 (129)                                   |
| Pakistani                                                 | 6.3 (91)                                 | 4.8 (89)                             | 5.4 (180)                                   |
| Bangladeshi                                               | 1.5 (22)                                 | 2.0 (37)                             | 1.8 (59)                                    |
| Other Asian                                               | 4.1 (59)                                 | 4.2 (78)                             | 4.1 (137)                                   |
| Caribbean                                                 | 0.8 (12)                                 | 1.4 (26)                             | 1.1 (38)                                    |
| Black African                                             | 0.8 (11)                                 | 1.7 (31)                             | 1.3 (42)                                    |
| Chinese                                                   | 0.5 (7)                                  | 0.4 (8)                              | 0.5 (15)                                    |
| Other ethnic group                                        | 4.2 (61)                                 | 5.2 (97)                             | 4.8 (158)                                   |
| Not recorded                                              | 5.2 (75)                                 | 8.2 (152)                            | 6.9 (227)                                   |
| <b>Prior length of hospital stay [N =1834/1454]</b>       |                                          |                                      |                                             |
| Mean (SD)                                                 | 2.5 (13.4)                               | 2.9 (17.0)                           | 2.7 (15.5)                                  |
| Median IQR                                                | 1 (0 - 3)                                | 1 (0 - 3)                            | 1 (0 - 3)                                   |
| <b>Dependency before admission to acute hospital care</b> |                                          |                                      |                                             |
| Able to live without assistance in daily activities       | 88.4 (1286)                              | 86.6 (1603)                          | 87.4 (2889)                                 |
| Some assistance in daily activities                       | 8.7 (126)                                | 7.1 (131)                            | 7.8 (257)                                   |
| Total assistance with all daily activities                | <5                                       | <5                                   | 0.2 (6)                                     |
| Not recorded                                              | 2.8 (41)                                 | 6.1 (113)                            | 4.7 (154)                                   |
| <b>Severe comorbidities</b>                               |                                          |                                      |                                             |
| Cardiovascular                                            | <5                                       | >10                                  | 0.4 (13)                                    |
| Respiratory                                               | 0.5 (8)                                  | 0.9 (16)                             | 0.7 (24)                                    |
| Renal*                                                    | 0.5 (8)                                  | 0.3 (6)                              | 0.4 (14)                                    |
| Liver                                                     | >5                                       | <5                                   | 0.3 (9)                                     |
| Metastatic disease                                        | >5                                       | <5                                   | 0.3 (9)                                     |
| Haematological malignancy                                 | 0.8 (12)                                 | 0.4 (7)                              | 0.6 (19)                                    |
| Immunocompromised                                         | 2.1 (31)                                 | 1.3 (24)                             | 1.7 (55)                                    |
| <b>BMI</b>                                                |                                          |                                      |                                             |
| <25                                                       | 22.2 (323)                               | 26.3 (487)                           | 24.5 (810)                                  |
| 25 to <30                                                 | 28.1 (409)                               | 26.1 (484)                           | 27.0 (893)                                  |
| 30 to <40                                                 | 37.7 (549)                               | 34.4 (637)                           | 35.9 (1186)                                 |
| 40+                                                       | 12.0 (174)                               | 13.1 (243)                           | 12.6 (417)                                  |
| <b>CPR within previous 21h</b>                            |                                          |                                      |                                             |
| In the community                                          | 0.8 (11)                                 | 0.4 (7)                              | 0.5 (18)                                    |
| In the hospital                                           | 0.7 (10)                                 | 0.9 (16)                             | 0.8 (26)                                    |
| No                                                        | 97.5 (1418)                              | 96.1 (1778)                          | 96.7 (3196)                                 |
| Not recorded                                              | 1.1 (16)                                 | 2.7 (50)                             | 2.0 (66)                                    |
| <b>Currently or recently pregnant</b>                     |                                          |                                      |                                             |
| Currently pregnant                                        | 0.5 (7)                                  | 0.8 (15)                             | 0.7 (22)                                    |
| Recently pregnant (within 6 weeks)                        | 0.3 (5)                                  | 0.5 (10)                             | 0.5 (15)                                    |
| Not known to be pregnant                                  | 99.2 (1443)                              | 98.6 (1826)                          | 98.9 (3269)                                 |
| <b>Invasively ventilated within first 24h</b>             |                                          |                                      |                                             |
| No                                                        | 74.8 (1088)                              | 64.8 (1200)                          | 69.2 (2288)                                 |
| Yes                                                       | 22.5 (327)                               | 25.2 (467)                           | 24.0 (794)                                  |
| Not recorded                                              | 2.7 (40)                                 | 9.9 (184)                            | 6.8 (224)                                   |
| <b>APACHE II score [N = 1540/2869 ]</b>                   |                                          |                                      |                                             |
| Mean (SD)                                                 | 13.9 (5.1)                               | 12.9 (4.9)                           | 13.3 (5.0)                                  |
| Median (IQR)                                              | 13 (11 - 16)                             | 13 (10 - 16)                         | 13 (10 - 16)                                |

|                                                              |                    |                   |                   |
|--------------------------------------------------------------|--------------------|-------------------|-------------------|
| <b>PaO<sub>2</sub>/FiO<sub>2</sub> ratio [N = 1329/1540]</b> |                    |                   |                   |
| Median (IQR)                                                 | 13.3 (10.0 – 18.2) | 13.5 (9.9 – 18.3) | 13.4 (9.8 – 18.2) |
| <b>PaO<sub>2</sub>/FiO<sub>2</sub> ratio</b>                 |                    |                   |                   |
| < 13.3 kPa (<100 mmHg)                                       | 45.9 (668)         | 40.2 (745)        | 42.7 (1413)       |
| 13.3-16.6 kPa (100-200 mmHg)                                 | 38.1 (554)         | 36.3 (671)        | 37.1 (1225)       |
| > 26.6 kPa (> 200 mmHg)                                      | 7.4 (107)          | 6.7 (124)         | 7.0 (231)         |
| Not recorded                                                 | 8.7 (126)          | 16.8 (311)        | 13.2 (437)        |
| <b>FiO<sub>2</sub> [N = 1329/1540]</b>                       |                    |                   |                   |
| Median (IQR)                                                 | 0.6 (0.45 – 0.75)  | 0.6 (0.45 – 0.80) | 0.6 (0.45 – 0.77) |

\* Chronic, irreversible renal disease and being dialysis dependent prior to critical care unit admission.

**Appendix, part 6: Demographic, medical characteristics and indicators of acute severity observed in patients of the critical care-cohort after matching.**

|                                                           | <b>Non-SGTF</b><br><i>Cols% (counts)</i> | <b>SGTF</b><br><i>Cols% (counts)</i> | <b>Full Cohort</b><br><i>Cols% (counts)</i> |
|-----------------------------------------------------------|------------------------------------------|--------------------------------------|---------------------------------------------|
| <b>Total number of patients</b>                           | 1031                                     | 1031                                 | 2062                                        |
| <b>Mean age (SD)</b>                                      | 59.6 (12.6)                              | 57.9 (12.4)                          | 58.7 (12.5)                                 |
| <b>Sex</b>                                                |                                          |                                      |                                             |
| Female                                                    | 34.4 (355)                               | 36.6 (377)                           | 35.5 (732)                                  |
| Male                                                      | 65.6 (676)                               | 63.4 (654)                           | 64.5 (1330)                                 |
| <b>Ethnicity</b>                                          |                                          |                                      |                                             |
| White                                                     | 69.6 (718)                               | 70.4 (726)                           | 70.0 (1444)                                 |
| Indian                                                    | 4.1 (42)                                 | 3.0 (31)                             | 3.5 (73)                                    |
| Pakistani                                                 | 4.2 (43)                                 | 6.5 (67)                             | 5.3 (110)                                   |
| Bangladeshi                                               | 1.4 (14)                                 | 1.8 (19)                             | 1.6 (33)                                    |
| Other Asian                                               | 2.9 (30)                                 | 3.0 (31)                             | 3.0 (61)                                    |
| Caribbean                                                 | 0.9 (9)                                  | 0.7 (7)                              | 0.8 (16)                                    |
| Black African                                             | 0.8 (8)                                  | 1.6 (17)                             | 1.2 (25)                                    |
| Chinese                                                   | 0.5 (5)                                  | 0.1 (1)                              | 0.3 (6)                                     |
| Other ethnic group                                        | 4.5 (46)                                 | 4.5 (46)                             | 4.5 (92)                                    |
| Not recorded                                              | 11.3 (116)                               | 8.3 (86)                             | 9.8 (202)                                   |
| <b>Prior length of hospital stay [N =1008 / 1024]</b>     |                                          |                                      |                                             |
| Mean (SD)                                                 | 3.4 (16.7)                               | 2.4 (11.8)                           | 2.9 (14.5)                                  |
| Median IQR                                                | 1 (0 - 3)                                | 1 (0 - 3)                            | 1 (0 - 3)                                   |
| <b>Dependency before admission to acute hospital care</b> |                                          |                                      |                                             |
| Able to live without assistance in daily activities       | 77.1 (795)                               | 81.3 (838)                           | 79.2 (1633)                                 |
| Some assistance in daily activities                       | 9.1 (94)                                 | 6.8 (70)                             | 8.0 (164)                                   |
| Total assistance with all daily activities                | <5                                       | <5                                   | 0.3 (6)                                     |
| Not recorded                                              | 13.5 (139)                               | 11.6 (120)                           | 12.6 (259)                                  |
| <b>Severe comorbidities [N = 3641/ 1761]</b>              |                                          |                                      |                                             |
| Cardiovascular                                            | <5                                       | >5                                   | 0.5 (10)                                    |
| Respiratory                                               | 1.4 (14)                                 | 1.0 (10)                             | 1.2 (24)                                    |
| Renal*                                                    | <5                                       | 0.7 (7)                              | 0.4 (9)                                     |
| Liver                                                     | <5                                       | <5                                   | <5                                          |
| Metastatic disease                                        | >5                                       | <5                                   | 0.4 (8)                                     |
| Haematological malignancy                                 | >5                                       | <5                                   | 0.5 (11)                                    |
| Immunocompromised                                         | 2.1 (22)                                 | 1.6 (16)                             | 1.8 (38)                                    |
| <b>BMI</b>                                                |                                          |                                      |                                             |
| <25                                                       | 33.8 (348)                               | 30.3 (312)                           | 32.0 (660)                                  |
| 25 to <30                                                 | 19.8 (204)                               | 24.4 (252)                           | 22.1 (456)                                  |
| 30 to <40                                                 | 35.0 (361)                               | 33.4 (344)                           | 34.2 (705)                                  |
| 40+                                                       | 11.4 (118)                               | 11.9 (123)                           | 11.7 (241)                                  |
| <b>CPR within previous 21h</b>                            |                                          |                                      |                                             |
| In the community                                          | 0.6 (6)                                  | 0.3 (3)                              | 0.4 (9)                                     |
| In the hospital                                           | 1.2 (12)                                 | 0.7 (7)                              | 0.9 (19)                                    |
| No                                                        | 90.2 (930)                               | 92.0 (949)                           | 91.1 (1879)                                 |
| Not recorded                                              | 8.1 (83)                                 | 7.0 (72)                             | 7.5 (155)                                   |
| <b>Currently or recently pregnant</b>                     |                                          |                                      |                                             |
| Currently pregnant                                        | <5                                       | 0.5 (5)                              | 0.4 (8)                                     |
| Recently pregnant (within 6 weeks)                        | 0.5 (5)                                  | 0.9 (9)                              | 0.7 (14)                                    |
| Not known to be pregnant                                  | 99.2 (1023)                              | 98.6 (1017)                          | 98.9 (2040)                                 |
| <b>Invasively ventilated within first 24h</b>             |                                          |                                      |                                             |
| No                                                        | 57.6 (594)                               | 61.3 (632)                           | 59.5 (1226)                                 |
| Yes                                                       | 28.1 (290)                               | 23.9 (246)                           | 26.0 (536)                                  |
| Not recorded                                              | 14.3 (147)                               | 14.8 (153)                           | 14.5 (300)                                  |
| <b>APACHE II score [N = 922/913]</b>                      |                                          |                                      |                                             |
| Mean (SD)                                                 | 13.7 (5.6)                               | 13.0 (4.9)                           | 13.4 (5.3)                                  |

|                                                            |                   |                   |                   |
|------------------------------------------------------------|-------------------|-------------------|-------------------|
| Median (IQR)                                               | 14 (11 - 16)      | 13 (10 - 16)      | 13 (10 - 16)      |
| <b>PaO<sub>2</sub>/FiO<sub>2</sub> ratio [N = 820/812]</b> |                   |                   |                   |
| Median (IQR)                                               | 13.2 (9.6 – 18.2) | 13.3 (9.8 – 17.7) | 13.2 (9.8 – 18.0) |
| <b>PaO<sub>2</sub>/FiO<sub>2</sub> ratio</b>               |                   |                   |                   |
| < 13.3 kPa (<100 mmHg)                                     | 40.8 (421)        | 39.5 (407)        | 40.2 (828)        |
| 13.3-16.6 kPa (100-200 mmHg)                               | 31.1 (321)        | 35.3 (364)        | 33.2 (685)        |
| > 26.6 kPa (> 200 mmHg)                                    | 7.6 (78)          | 4.0 (41)          | 5.8 (119)         |
| Not recorded                                               | 20.5 (211)        | 21.2 (219)        | 20.9 (430)        |
| <b>FiO<sub>2</sub> [N = 820/812]</b>                       |                   |                   |                   |
| Median (IQR)                                               | 0.6 (0.50 – 0.75) | 0.6 (0.50 – 0.80) | 0.6 (0.50 – 0.75) |

\* Chronic, irreversible renal disease and being dialysis dependent prior to critical care unit admission.

**Appendix, part 7: Demographics characteristics of primary care patients tested positive in hospital and community settings between 1<sup>st</sup> November 2020 and 26<sup>th</sup> January 2021 by months.**

|                                 | <i>November 2020</i>     |                           | <i>December 2020</i>     |                           | <i>January 2021</i>      |                           |
|---------------------------------|--------------------------|---------------------------|--------------------------|---------------------------|--------------------------|---------------------------|
|                                 | <b>Hospital settings</b> | <b>Community settings</b> | <b>Hospital settings</b> | <b>Community settings</b> | <b>Hospital settings</b> | <b>Community settings</b> |
|                                 | <i>Cols%</i>             | <i>Cols%</i>              | <i>Cols%</i>             | <i>Cols%</i>              | <i>Cols%</i>             | <i>Cols%</i>              |
|                                 | <i>(counts)</i>          | <i>(counts)</i>           | <i>(counts)</i>          | <i>(counts)</i>           | <i>(counts)</i>          | <i>(counts)</i>           |
| <b>Total number of patients</b> | 10520                    | 76188                     | 16999                    | 134493                    | 20520                    | 171206                    |
| <b>Mean age (SD)</b>            | 57.3 (23.7)              | 38.2 (19.1)               | 55.9 (23.7)              | 37.3 (18.5)               | 57.0 (23.2)              | 39.3 (18.9)               |
| <b>Deaths</b>                   | 15.6 (1644)              | 0.7 (517)                 | 15.8 (2678)              | 0.8 (1118)                | 16.0 (3284)              | 1.1 (1858)                |
| <b>CCU admitted</b>             | 3.4 (355)                | 0.3 (241)                 | 3.9 (657)                | 0.4 (484)                 | 3.0 (617)                | 0.3 (647)                 |
| <b>SGTF</b>                     | 0.0 (0)                  | 6.8 (5199)                | 0.0 (0)                  | 32.9 (44280)              | 0.0 (0)                  | 40.0 (68448)              |
| <b>Sex</b>                      |                          |                           |                          |                           |                          |                           |
| Female                          | 55.1 (5797)              | 54.2 (41301)              | 55.9 (9497)              | 54.4 (73123)              | 54.2 (11114)             | 54.2 (92871)              |
| Male                            | 44.9 (4723)              | 45.8 (34887)              | 44.1 (7502)              | 45.6 (61370)              | 45.8 (9406)              | 45.8 (78335)              |
| <b>Age groups</b>               |                          |                           |                          |                           |                          |                           |
| 18-29                           | 15.9 (1677)              | 37.0 (28213)              | 16.4 (2789)              | 36.9 (49682)              | 14.8 (3033)              | 33.9 (58096)              |
| 30-39                           | 11.3 (1188)              | 18.3 (13922)              | 12.6 (2143)              | 19.8 (26683)              | 12.5 (2568)              | 19.8 (33842)              |
| 40-49                           | 11.4 (1195)              | 15.9 (12125)              | 12.4 (2114)              | 17.5 (23496)              | 11.8 (2416)              | 16.3 (27942)              |
| 50-59                           | 13.1 (1378)              | 15.1 (11507)              | 13.4 (2275)              | 14.3 (19245)              | 13.5 (2767)              | 15.8 (26991)              |
| 60-69                           | 10.8 (1136)              | 7.8 (5934)                | 10.4 (1767)              | 6.6 (8936)                | 11.7 (2398)              | 8.0 (13669)               |
| 70-79                           | 13.7 (1443)              | 3.3 (2481)                | 12.4 (2107)              | 2.7 (3581)                | 13.5 (2775)              | 3.3 (5565)                |
| 80-99                           | 23.8 (2503)              | 2.6 (2006)                | 22.4 (3804)              | 2.1 (2870)                | 22.2 (4563)              | 3.0 (5101)                |
| <b>Ethnicity</b>                |                          |                           |                          |                           |                          |                           |
| White                           | 65.1 (6851)              | 61.7 (46995)              | 60.8 (10343)             | 58.8 (79116)              | 60.9 (12491)             | 57.3 (98076)              |
| Indian                          | 3.1 (330)                | 3.4 (2599)                | 3.7 (631)                | 4.1 (5523)                | 3.1 (635)                | 3.9 (6707)                |
| Pakistani                       | 2.9 (303)                | 4.4 (3358)                | 2.5 (419)                | 3.4 (4640)                | 2.3 (467)                | 3.3 (5702)                |
| Bangladeshi                     | 1.5 (161)                | 2.8 (2105)                | 2.4 (415)                | 3.9 (5194)                | 1.9 (389)                | 3.4 (5778)                |
| Other Asian                     | 1.8 (193)                | 1.9 (1428)                | 2.8 (481)                | 2.5 (3315)                | 2.6 (530)                | 2.6 (4392)                |
| Caribbean                       | 1.1 (120)                | 0.5 (413)                 | 2.1 (350)                | 1.1 (1460)                | 2.7 (547)                | 1.5 (2578)                |
| Black                           |                          |                           |                          |                           |                          |                           |
| African                         | 2.3 (238)                | 1.8 (1359)                | 3.7 (634)                | 2.4 (3206)                | 4.0 (826)                | 3.0 (5127)                |
| Chinese                         | 0.3 (36)                 | 0.2 (134)                 | 0.3 (52)                 | 0.4 (501)                 | 0.3 (58)                 | 0.3 (580)                 |
| Other ethnic group              | 3.1 (325)                | 3.3 (2517)                | 4.6 (779)                | 4.8 (6425)                | 5.0 (1016)               | 4.8 (8282)                |
| Not recorded                    | 18.7 (1963)              | 20.1 (15280)              | 17.0 (2895)              | 18.7 (25113)              | 17.4 (3561)              | 19.8 (33984)              |
| <b>House size</b>               |                          |                           |                          |                           |                          |                           |
| 1 person                        | 38.9 (4091)              | 26.2 (19924)              | 39.0 (6634)              | 25.3 (33981)              | 41.2 (8460)              | 27.3 (46674)              |
| 2 people                        | 23.9 (2518)              | 20.0 (15271)              | 23.8 (4045)              | 19.0 (25614)              | 23.6 (4844)              | 20.5 (35027)              |
| 3-5 people                      | 29.0 (3046)              | 45.0 (34281)              | 29.6 (5037)              | 47.2 (63519)              | 28.1 (5765)              | 43.6 (74676)              |
| 6-10 people or more             | 8.2 (865)                | 8.8 (6712)                | 7.5 (1283)               | 8.5 (11379)               | 7.1 (1451)               | 8.7 (14829)               |
| <b>House type</b>               |                          |                           |                          |                           |                          |                           |
| Neither                         | 95.6 (10054)             | 98.9 (75313)              | 96.4 (16393)             | 99.0 (133214)             | 96.5 (19795)             | 98.7 (168939)             |
| Carehome                        | 4.1 (434)                | 1.1 (818)                 | 3.2 (547)                | 0.9 (1168)                | 3.2 (662)                | 1.2 (2076)                |
| Homeless                        | 0.3 (32)                 | 0.1 (57)                  | 0.3 (59)                 | 0.1 (111)                 | 0.3 (63)                 | 0.1 (191)                 |
| <b>BMI</b>                      |                          |                           |                          |                           |                          |                           |
| <25                             | 60.2 (6334)              | 54.6 (41572)              | 60.9 (10348)             | 55.7 (74926)              | 58.9 (12086)             | 55.6 (95255)              |
| 25-30                           | 15.8 (1663)              | 12.8 (9779)               | 15.2 (2582)              | 12.0 (16074)              | 16.5 (3376)              | 12.9 (22168)              |
| 30-40                           | 7.2 (761)                | 5.3 (4021)                | 7.1 (1212)               | 4.8 (6395)                | 7.5 (1545)               | 5.4 (9293)                |
| >= 40                           | 3.9 (413)                | 3.0 (2284)                | 3.8 (650)                | 2.5 (3362)                | 4.3 (878)                | 2.9 (4940)                |
| Not recorded                    | 12.8 (1349)              | 24.3 (18532)              | 13.0 (2207)              | 25.1 (33736)              | 12.8 (2635)              | 23.1 (39550)              |

|                             |             |              |             |              |              |              |
|-----------------------------|-------------|--------------|-------------|--------------|--------------|--------------|
| <b>Smoking status</b>       |             |              |             |              |              |              |
| Non smoker                  | 56.0 (5889) | 56.6 (43127) | 57.5 (9777) | 56.0 (75380) | 56.5 (11589) | 55.5 (95012) |
| Ex smoker                   | 27.8 (2924) | 17.5 (13357) | 25.6 (4357) | 17.1 (22994) | 25.9 (5312)  | 17.5 (30027) |
| Light smoker                | 7.9 (826)   | 8.3 (6319)   | 8.1 (1385)  | 8.5 (11474)  | 9.5 (1956)   | 10.8 (18491) |
| Moderate smoker             | 1.7 (175)   | 1.5 (1162)   | 1.6 (275)   | 1.4 (1914)   | 1.9 (396)    | 2.1 (3554)   |
| Heavy smoker                | 1.0 (109)   | 0.5 (388)    | 0.9 (156)   | 0.5 (617)    | 1.0 (210)    | 0.8 (1311)   |
| Not recorded                | 5.7 (597)   | 15.5 (11835) | 6.2 (1049)  | 16.4 (22114) | 5.2 (1057)   | 13.3 (22811) |
| <b>Geographic region</b>    |             |              |             |              |              |              |
| East Midlands               | 1.8 (186)   | 2.5 (1912)   | 1.5 (256)   | 1.5 (2045)   | 1.5 (299)    | 1.7 (2890)   |
| East of England             | 2.5 (262)   | 2.0 (1549)   | 4.2 (721)   | 3.9 (5229)   | 4.1 (844)    | 3.7 (6385)   |
| London                      | 16.1 (1694) | 19.5 (14841) | 32.1 (5460) | 40.5 (54499) | 30.6 (6287)  | 33.4 (57120) |
| North East                  | 4.2 (447)   | 3.8 (2886)   | 2.1 (364)   | 1.4 (1895)   | 2.0 (411)    | 1.6 (2654)   |
| North West                  | 26.6 (2798) | 23.1 (17575) | 14.6 (2480) | 10.6 (14302) | 17.4 (3575)  | 17.5 (29880) |
| South Central               | 7.8 (822)   | 8.4 (6423)   | 11.2 (1910) | 11.2 (15070) | 13.2 (2701)  | 11.7 (20001) |
| South East                  | 10.6 (1115) | 10.8 (8264)  | 15.2 (2580) | 16.9 (22754) | 10.9 (2237)  | 11.8 (20281) |
| South West                  | 11.3 (1185) | 9.9 (7545)   | 7.2 (1232)  | 4.9 (6590)   | 7.8 (1598)   | 6.3 (10775)  |
| West Midlands               | 14.8 (1553) | 14.8 (11304) | 9.3 (1575)  | 7.3 (9845)   | 10.3 (2120)  | 10.6 (18124) |
| Yorkshire & Humber          | 4.4 (458)   | 5.1 (3889)   | 2.5 (421)   | 1.7 (2264)   | 2.2 (448)    | 1.8 (3096)   |
| <b>Deprivation quintile</b> |             |              |             |              |              |              |
| 1 (least deprived)          | 21.0 (2214) | 21.6 (16442) | 18.7 (3187) | 18.7 (25147) | 17.7 (3641)  | 17.4 (29743) |
| 2                           | 20.9 (2202) | 22.2 (16921) | 20.0 (3399) | 21.1 (28324) | 19.6 (4027)  | 20.2 (34500) |
| 3                           | 22.1 (2325) | 21.5 (16404) | 21.4 (3632) | 20.3 (27256) | 21.0 (4301)  | 21.3 (36383) |
| 4                           | 20.7 (2174) | 19.2 (14656) | 20.5 (3488) | 19.6 (26400) | 20.8 (4274)  | 20.9 (35862) |
| 5 (most deprived)           | 14.8 (1559) | 14.8 (11295) | 18.8 (3198) | 19.7 (26466) | 20.3 (4164)  | 19.6 (33625) |
| Not recorded                | 0.4 (46)    | 0.6 (470)    | 0.6 (95)    | 0.7 (900)    | 0.6 (113)    | 0.6 (1093)   |
| <b>Comorbidities</b>        |             |              |             |              |              |              |
| Asthma                      | 15.8 (1667) | 15.2 (11561) | 14.6 (2482) | 14.4 (19379) | 15.4 (3155)  | 14.4 (24617) |
| COPD                        | 8.0 (838)   | 1.2 (918)    | 6.8 (1159)  | 0.8 (1120)   | 6.5 (1343)   | 1.2 (1994)   |
| Diabetes type 1             | 1.1 (120)   | 0.5 (403)    | 0.9 (145)   | 0.6 (772)    | 0.8 (158)    | 0.5 (911)    |
| Diabetes type 2             | 16.4 (1729) | 5.0 (3843)   | 17.2 (2931) | 4.5 (6051)   | 17.5 (3586)  | 5.5 (9378)   |
| Hypertension                | 33.6 (3533) | 10.9 (8333)  | 32.9 (5588) | 9.6 (12974)  | 34.2 (7020)  | 11.5 (19739) |
| Parkinson                   | 1.4 (146)   | 0.1 (108)    | 1.0 (177)   | 0.1 (181)    | 1.2 (245)    | 0.2 (323)    |
| Epilepsy                    | 2.5 (265)   | 1.2 (935)    | 2.1 (358)   | 1.1 (1498)   | 2.3 (482)    | 1.3 (2205)   |
| Cerebral palsy              | 0.3 (27)    | 0.1 (85)     | 0.1 (25)    | 0.1 (126)    | 0.3 (57)     | 0.1 (226)    |
| MND                         | 0.1 (6)     | 0.0 (3)      | 0.0 (6)     | 0.0 (8)      | 0.0 (5)      | 0.0 (6)      |
| Huntington                  | 0.0 (2)     | 0.0 (6)      | 0.0 (2)     | 0.0 (12)     | 0.0 (6)      | 0.0 (22)     |
| Multiple sclerosis          | 0.4 (43)    | 0.2 (122)    | 0.4 (67)    | 0.1 (165)    | 0.3 (68)     | 0.2 (283)    |
| Myasthenia                  | 0.1 (11)    | 0.0 (21)     | 0.1 (18)    | 0.0 (31)     | 0.1 (12)     | 0.0 (43)     |
| Downs syndrome              | 0.1 (13)    | 0.0 (31)     | 0.1 (18)    | 0.1 (68)     | 0.2 (38)     | 0.1 (130)    |

---

|                       |           |            |           |            |           |            |
|-----------------------|-----------|------------|-----------|------------|-----------|------------|
| Learning disabilities | 3.8 (395) | 1.8 (1404) | 3.0 (510) | 1.6 (2210) | 3.8 (771) | 2.0 (3355) |
|-----------------------|-----------|------------|-----------|------------|-----------|------------|

---

**Appendix, part 8: Counts of deaths by region compared with the ones observed in the primary care cohort. The counts of deaths in England were taken from <https://coronavirus.data.gov.uk/details/deaths>. All regions were covered in the primary care cohort for both the SGTF and non-SGTF group.**

|                            | <b>England<br/>(gov.uk<br/>data)</b> | <b>Primary care<br/>cohort</b> | <b>Coverage<br/>in the<br/>study</b> | <b>Primary care cohort</b> |            |
|----------------------------|--------------------------------------|--------------------------------|--------------------------------------|----------------------------|------------|
|                            | <i>Cols%<br/>(counts)</i>            | <i>Cols% (counts)</i>          | <i>Row %</i>                         | Non- SGTF                  | SGTF       |
| Number of deaths           | 65494                                | 899                            | 1.4                                  | 334                        |            |
| <b>Geographical region</b> |                                      |                                |                                      |                            |            |
| East Midlands              | 9.4 (6174)                           | 1.5 (13)                       | 0.2                                  | 2.1 (7)                    | 1.1 (6)    |
| East of England            | 13.7 (8561)                          | 2.0 (18)                       | 0.2                                  | <5                         | >10        |
| London                     | 13.2 (8650)                          | 17.5 (157)                     | 1.8                                  | 6.9 (23)                   | 23.7 (134) |
| North East                 | 4.7 (3088)                           | 6.2 (56)                       | 1.8                                  | 12.0 (40)                  | 2.8 (16)   |
| North West                 | 14.0 (9203)                          | 30.1 (271)                     | 2.9                                  | 39.9 (133)                 | 24.4 (138) |
| South Central              |                                      | 9.6 (86)                       |                                      | 4.5 (15)                   | 12.6 (71)  |
| South East                 | 17.5 (11503)                         | 11.2 (101)                     | 0.9                                  | 3.3 (11)                   | 15.9 (90)  |
| South West                 | 6.9 (4507)                           | 3.7 (33)                       | 0.7                                  | 5.4 (18)                   | 2.7 (15)   |
| West Midlands              | 12.0 (7854)                          | 14.7 (132)                     | 1.7                                  | 18.3 (61)                  | 12.6 (71)  |
| Yorkshire & Humber         | 9.1 (5954)                           | 3.6 (32)                       | 0.5                                  | 6.6 (22)                   | 1.8 (10)   |

**Appendix, part 8: Counts of deaths observed in the primary care cohort by age group and COVID19 28-day mortality HR by age groups. Late update for mortality data was 23<sup>rd</sup> February 2021.**

| <b>Age group</b> | <b>Non-SGTF</b>                               | <b>SGTF</b>                                   | <b>HR (95% CI)</b>      |
|------------------|-----------------------------------------------|-----------------------------------------------|-------------------------|
|                  | <i>Within age group<br/>deaths % (counts)</i> | <i>Within age group<br/>deaths % (counts)</i> | <i>Baseline (50-59)</i> |
| 18-29            | <5                                            | <5                                            | 0.005 (0.0007, 0.03)    |
| 30-39            | 0.0 (7)                                       | 0.0 (12)                                      | 0.15 (0.09, 0.25)       |
| 40-49            | 0.0 (7)                                       | 0.1 (24)                                      | 0.26 (0.18, 0.39)       |
| 50-59            | 0.3 (34)                                      | 0.4 (76)                                      | 2.80 (2.19, 3.58)       |
| 60-69            | 0.8 (48)                                      | 1.3 (113)                                     | 1                       |
| 70-79            | 3.3 (83)                                      | 4.8 (145)                                     | 10.82 (8.50, 13.76)     |
| 80-99            | 12.2 (155)                                    | 15.0 (194)                                    | 37.72 (29.31, 48.54)    |
